# Supplementary material for: Co-Administration of Iron and a Bioavailable Curcumin Supplement Increases Serum BDNF Levels in Healthy Adults
Source: MDPI journal article supplement (doi:10.3390/antiox9080645), 2020-07-22
Supplement: s1 [file s1]

## Supplementary figures

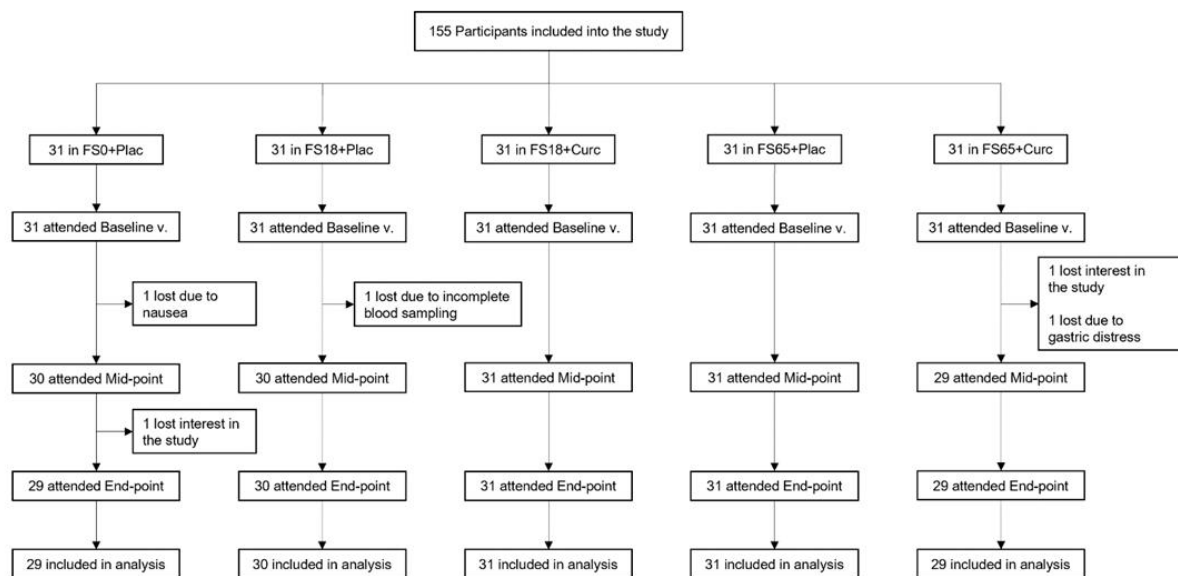

**Figure S1.** Study compliance after 155 participants were enrolled and randomised equally into 5 treatment groups: FS0+Plac (full placebo, placebos for both iron and curcumin), FS18+Plac (18 mg elemental iron and placebo for curcumin), FS18+Curc (18 mg elemental iron and 500 mg curcumin), FS65+Plac (65 mg elemental iron and placebo for curcumin) and FS65+Curc (65 mg elemental iron and 500 mg curcumin).

**Table S1.** Mean BDNF (ng/mL) values per treatment group/timepoint (mean  $\pm$  SEM).

| Timepoint | FS0+Plac         | FS18+Plac        | FS18+Curc        | FS65+Plac        | FS65+Curc        |
|-----------|------------------|------------------|------------------|------------------|------------------|
| Baseline  | 35.18 $\pm$ 2.10 | 37.16 $\pm$ 1.88 | 30.28 $\pm$ 1.54 | 31.59 $\pm$ 1.35 | 30.85 $\pm$ 1.99 |
| Mid-point | 31.50 $\pm$ 1.27 | 32.00 $\pm$ 1.48 | 31.42 $\pm$ 1.02 | 32.64 $\pm$ 1.08 | 32.00 $\pm$ 1.29 |
| End-point | 36.62 $\pm$ 2.17 | 36.04 $\pm$ 1.66 | 39.17 $\pm$ 4.96 | 33.28 $\pm$ 1.81 | 39.16 $\pm$ 4.96 |
